# Supplementary material for: Feline Calicivirus Virulent Systemic Disease: Clinical Epidemiology, Analysis of Viral Isolates and In Vitro Efficacy of Novel Antivirals in Australian Outbreaks
Source: MDPI journal article supplement (doi:10.3390/v13102040), 2021-10-09
Supplement: s1 [file s1]

**Supplementary Table S1:** Summary of RNA-sequencing results of RNA extracted from oropharyngeal/conjunctival swabs or tissues from sampled cats in this study.

| Cases         | GenBank<br>Accession No. | Read<br>Count | Contigs | Reads<br>Mapped | Reads per<br>Million |
|---------------|--------------------------|---------------|---------|-----------------|----------------------|
| NSW5_V1       | MW880757                 | 127241260     | 30735   | 106347262       | 835792.27            |
| NSW5_V2       | MW880758                 | 112946412     | 891879  | 152719          | 1352.14              |
| NSW9_V1*      | -                        | 131951868     | 24750   | 99536924        | 754342.67            |
| NSW9_V2       | MW880759                 | 131951868     | 24750   | 8569729         | 64945.87             |
| QLD5          | MW880766                 | 126373048     | 141343  | 15854083        | 125454.62            |
| QLD6          | MW880765                 | 142583738     | 101261  | 18998254        | 133242.78            |
| QLD8          | MW880771                 | 122917554     | 28307   | 22086249        | 179683.44            |
| QLD9          | MW880761                 | 123342872     | 163172  | 14335903        | 116228.06            |
| QLD10         | MW880762                 | 125677722     | 20343   | 19605713        | 155999.91            |
| QLD12         | MW880760                 | 125046816     | 98305   | 16353907        | 130782.27            |
| QLD13         | MW880763                 | 83299626      | 1860    | 42785903        | 513638.60            |
| ACT1          | MW880767                 | 142608064     | 73633   | 47644293        | 334092.56            |
| ACT2          | MW880769                 | 134000790     | 33540   | 107954102       | 805622.88            |
| ACT3          | MW880764                 | 94284000      | 5430    | 43940299        | 466041.95            |
| ACT7          | MW880768                 | 145687464     | 18221   | 52198716        | 358292.43            |
| ACT9          | MW880770                 | 117711790     | 17228   | 42174952        | 358289.96            |
| <b>Total</b>  | -                        | 1855673024    | 1650007 | 1516128084      | 817023.29            |
| <b>Median</b> | -                        | 126025385     | 32137   | 32130600        | 254953.40            |

\* Identical sequence to NSW5\_V1
